# Supplementary material for: CCL5 activation of CCR5 regulates cell metabolism to enhance proliferation of breast cancer cells
Source: PubMed Central journal article supplement (PMC4929946; doi:10.1098/rsob.160122), 2016-06-22

Supplementary Figure S1.

**A**

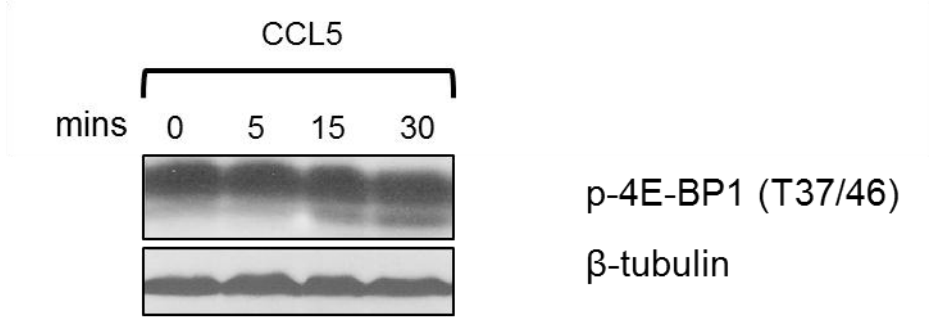

**B**

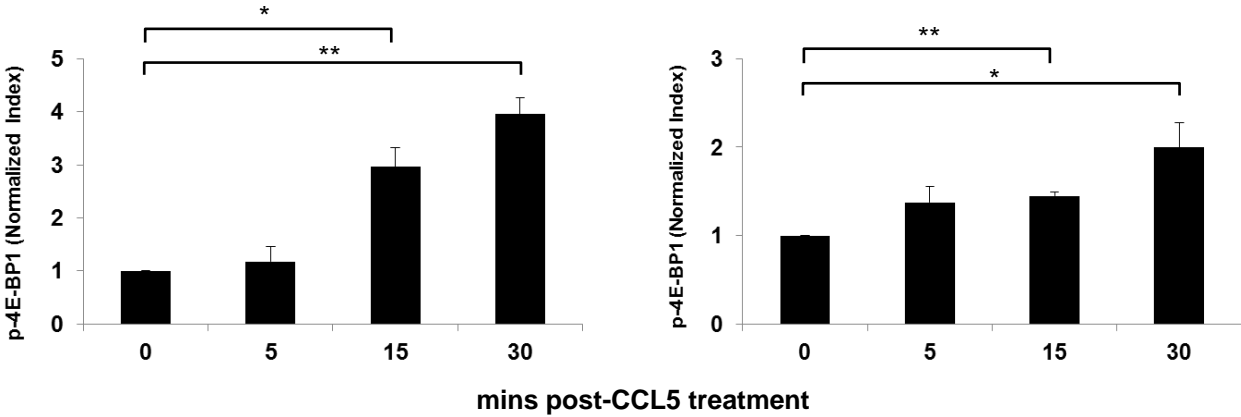

Supplement: rsob160122supp1.pdf [file rsob160122supp1.pdf]
