# Supplementary material for: CCL5 activation of CCR5 regulates cell metabolism to enhance proliferation of breast cancer cells
Source: PubMed Central journal article supplement (PMC4929946; doi:10.1098/rsob.160122), 2016-06-22
Supplement: rsob160122supp5.pdf [file rsob160122supp5.pdf]

Supplementary Table S1.

| Pathway                                              | Metabolite                              | PyMT             |               |               |                     |                     |                     |               |                     |               |
|------------------------------------------------------|-----------------------------------------|------------------|---------------|---------------|---------------------|---------------------|---------------------|---------------|---------------------|---------------|
|                                                      |                                         | Normalized Value |               |               | Fold Changes        |                     | Significance        |               |                     |               |
|                                                      |                                         | Untreated        | CCL5 3h       | CCL5 6h       | CCL5 3h / Untreated | CCL5 6h / Untreated | CCL5 3h / Untreated |               | CCL5 6h / Untreated |               |
|                                                      |                                         |                  |               |               | p-value             | q-value             | p-value             | q-value       |                     |               |
| Glycolysis, Gluconeogenesis, and Pyruvate Metabolism | glucose                                 | 2.4727           | 2.006         | 9.7804        | 0.81                | 3.96                | 0.5344              | 0.3366        | 0.0028              | 0.0037        |
|                                                      | <b>glucose-6-phosphate (G6P)</b>        | <b>0.5709</b>    | <b>0.5171</b> | <b>3.7326</b> | <b>0.91</b>         | <b>6.54</b>         | <b>0.8198</b>       | <b>0.4233</b> | <b>0.0012</b>       | <b>0.0024</b> |
|                                                      | glucose 1-phosphate                     | 1.4057           | 1.5452        | 3.1447        | 1.1                 | 2.24                | 0.5236              | 0.331         | 0.0112              | 0.0079        |
|                                                      | fructose-6-phosphate                    | 0.6356           | 0.659         | 1.3686        | 1.04                | 2.15                | 0.7294              | 0.3969        | 0.0196              | 0.0112        |
|                                                      | fructose 1,6-diphosphate                | 3.5357           | 5.626         | 12.5182       | 1.59                | 3.54                | 0.3063              | 0.2488        | 0.0387              | 0.0178        |
|                                                      | dihydroxyacetone phosphate (DHAP)       | 0.5709           | 0.8762        | 2.0062        | 1.53                | 3.51                | 0.0554              | 0.1173        | 0.0011              | 0.0024        |
|                                                      | 3-phosphoglycerate                      | 1.9383           | 2.1992        | 5.8344        | 1.13                | 3.01                | 0.5565              | 0.3463        | 0.0082              | 0.0067        |
|                                                      | <b>pyruvate</b>                         | <b>0.8391</b>    | <b>1.2159</b> | <b>1.4329</b> | <b>1.45</b>         | <b>1.71</b>         | <b>0.0603</b>       | <b>0.1187</b> | <b>0.0114</b>       | <b>0.008</b>  |
| <b>lactate</b>                                       | <b>0.3171</b>                           | <b>0.5076</b>    | <b>0.6272</b> | <b>1.6</b>    | <b>1.98</b>         | <b>0.0366</b>       | <b>0.1032</b>       | <b>0.0096</b> | <b>0.0076</b>       |               |
| Pentose Phosphate Pathway                            | 6-phosphogluconate                      | 0.5529           | 1.1239        | 1.5938        | <b>2.03</b>         | <b>2.88</b>         | 0.0193              | 0.0946        | 0.0046              | 0.0048        |
|                                                      | <b>ribose 5-phosphate</b>               | <b>1.0897</b>    | <b>1.2202</b> | <b>2.525</b>  | <b>1.12</b>         | <b>2.32</b>         | <b>0.2986</b>       | <b>0.247</b>  | <b>0.0228</b>       | <b>0.0121</b> |
|                                                      | ribose 1-phosphate                      | 1.5153           | 1.6306        | 2.993         | 1.08                | <b>1.98</b>         | 0.6573              | 0.3751        | 0.015               | 0.0094        |
|                                                      | ribulose/xylulose 5-phosphate           | 1.4523           | 2.2003        | 3.8152        | <b>1.52</b>         | <b>2.63</b>         | 0.0361              | 0.1032        | 0.0014              | 0.0027        |
| TCA Cycle                                            | citrate                                 | 0.7289           | 0.3851        | 2.7119        | 0.53                | <b>3.72</b>         | 0.5961              | 0.3547        | 0.0466              | 0.0203        |
|                                                      | isocitrate                              | 0.5044           | 0.0925        | 4.8958        | <b>0.18</b>         | <b>9.71</b>         | 0.0791              | 0.1288        | 0.016               | 0.0098        |
|                                                      | <b>alpha-ketoglutarate</b>              | <b>0.4587</b>    | <b>0.4904</b> | <b>1.053</b>  | <b>1.07</b>         | <b>2.3</b>          | <b>0.4674</b>       | <b>0.3106</b> | <b>0.0002</b>       | <b>0.0016</b> |
|                                                      | fumarate                                | 0.6958           | 0.9764        | 1.4333        | <b>1.4</b>          | <b>2.06</b>         | 0.0197              | 0.0946        | 0.001               | 0.0024        |
|                                                      | malate                                  | 0.9811           | 1.49          | 6.6506        | 1.52                | <b>6.78</b>         | 0.3806              | 0.2798        | 0.0389              | 0.0178        |
| Fatty Acid Metabolism                                | palmitate (16:0)                        | 1.5697           | 1.9971        | 3.4268        | 1.27                | <b>2.18</b>         | 0.1792              | 0.1813        | 0.0082              | 0.0067        |
|                                                      | palmitoleate (16:1n7)                   | 2.4005           | 3.5421        | 3.5463        | <b>1.48</b>         | <b>1.48</b>         | 0.0216              | 0.0946        | 0.0243              | 0.0128        |
|                                                      | margarate (17:0)                        | 0.757            | 0.9982        | 2.8362        | 1.32                | <b>3.75</b>         | 0.1323              | 0.159         | 0.0008              | 0.0024        |
|                                                      | stearate (18:0)                         | 0.7359           | 1.0144        | 2.1393        | <b>1.38</b>         | <b>2.91</b>         | 0.0739              | 0.1266        | 0.0009              | 0.0024        |
|                                                      | <b>stearyl carnitine</b>                | <b>0.2038</b>    | <b>0.1699</b> | <b>0.6857</b> | <b>0.83</b>         | <b>3.36</b>         | <b>0.9298</b>       | <b>0.4518</b> | <b>0.0245</b>       | <b>0.0128</b> |
|                                                      | <b>stearamide</b>                       | <b>0.5817</b>    | <b>0.4758</b> | <b>2.1142</b> | <b>0.82</b>         | <b>3.63</b>         | <b>0.4641</b>       | <b>0.3106</b> | <b>0.04</b>         | <b>0.018</b>  |
|                                                      | <b>acetyl CoA</b>                       | <b>0.1312</b>    | <b>0.3043</b> | <b>0.0574</b> | <b>2.32</b>         | <b>0.44</b>         | <b>0.1366</b>       | <b>0.1591</b> | <b>0.5507</b>       | <b>0.1392</b> |
|                                                      | <b>3-hydroxybutyrate (BHBA)</b>         | <b>1.2586</b>    | <b>3.774</b>  | <b>1.146</b>  | <b>3</b>            | <b>0.91</b>         | <b>0.0362</b>       | <b>0.1032</b> | <b>0.8825</b>       | <b>0.2001</b> |
| Leucine, Isoleucine and Valine Metabolism            | <b>leucine</b>                          | <b>0.8326</b>    | <b>0.9892</b> | <b>1.4139</b> | <b>1.19</b>         | <b>1.7</b>          | <b>0.2331</b>       | <b>0.2083</b> | <b>0.0175</b>       | <b>0.0104</b> |
|                                                      | <b>beta-hydroxyisovaleryl carnitine</b> | <b>0.7348</b>    | <b>0.7744</b> | <b>0.4787</b> | <b>1.05</b>         | <b>0.65</b>         | <b>0.6057</b>       | <b>0.3566</b> | <b>0.0405</b>       | <b>0.0182</b> |
|                                                      | isoleucine                              | 0.74             | 0.8586        | 1.2463        | 1.16                | <b>1.68</b>         | 0.2891              | 0.2405        | 0.0206              | 0.0116        |
|                                                      | valine                                  | 0.824            | 0.9355        | 1.4115        | 1.14                | <b>1.71</b>         | 0.3834              | 0.2798        | 0.0267              | 0.0137        |
| Glutamate Metabolism                                 | <b>glutamate</b>                        | <b>0.4893</b>    | <b>0.513</b>  | <b>1.3932</b> | <b>1.05</b>         | <b>2.85</b>         | <b>0.6108</b>       | <b>0.3577</b> | <b>0.0008</b>       | <b>0.0024</b> |
|                                                      | <b>glutamine</b>                        | <b>0.3324</b>    | <b>0.3343</b> | <b>1.0822</b> | <b>1.01</b>         | <b>3.26</b>         | <b>0.7144</b>       | <b>0.3952</b> | <b>0.0134</b>       | <b>0.0089</b> |
